# Supplementary material for: Mental health status and associated contributing factors among the Hakka elderly in Fujian, China
Source: Frontiers journal article supplement (doi:10.3389/fpubh.2022.928880), 2022-07-22
Supplement: Table_1.DOCX [file Table_1.DOCX]

Supplementary Material

# Supplementary Data

**Table 1**. Participants’ demographic characteristics and the total scores of SCL-90-R (n=1262).

| **Variables** | **Categories** | **n (%)** | **Mean ± S. D** | ***P* value** |
| --- | --- | --- | --- | --- |
| Sex | Male | 613 (48.57) | 1.25 ± 0.21 | < 0.001 |
| Female | 649 (51.43) | 1.31 ± 0.31 |  |
| Age (years) | 60-64 | 356 (28.21) | 1.43 ± 0.37 | < 0.001 |
| 65-69 | 248 (19.65) | 1.21 ± 0.09 |  |
| 70-74 | 227 (17.99) | 1.27 ± 0.32 |  |
| 75-79 | 204 (16.16) | 1.18 ± 0.17 |  |
| ≥ 80 | 227 (17.99) | 1.23 ± 0.14 |  |
| Marital status | Married/ Cohabitation | 843 (66.80) | 1.27 ± 0.28 | 0.016 |
| Widowed | 291 (23.06) | 1.29 ± 0.26 |  |
| Others | 128 (10.14) | 1.34 ± 0.29 |  |
| Hukou | Agricultural | 787 (62.36) | 1.32 ± 0.27 | < 0.001 |
| Non-agricultural | 475 (37.64) | 1.22 ± 0.27 |  |
| Current residence | Village | 478 (37.88) | 1.33 ± 0.28 | < 0.001 |
| Town | 274 (21.71) | 1.33 ± 0.32 |  |
| County | 510 (40.41) | 1.21 ± 0.23 |  |
| Education level | Illiterate | 674 (53.41) | 1.32 ± 0.28 | < 0.001 |
| Literacy class/ home school | 192 (15.21) | 1.19 ± 0.15 |  |
| Primary school | 192 (15.21) | 1.22 ± 0.21 |  |
| ≥ Junior high school | 204 (16.17) | 1.29 ± 0.36 |  |
| Average annual household incomes (CNY) | 15,000 or lower | 260 (20.60) | 1.36 ± 0.33 | < 0.001 |
| 15,001 ~ 30,000 | 349 (27.66) | 1.32 ± 0.27 |  |
| 30,001 ~ 45,000 | 339 (26.86) | 1.23 ± 0.24 |  |
| 45,001 ~ 60,000 | 214 (16.96) | 1.21 ± 0.23 |  |
| 60,001 or higher | 100 (7.92) | 1.29 ± 0.28 |  |
| Survival of parents | Both died | 741 (58.72) | 1.26 ± 0.24 | 0.002 |
| Father or/ and mother alive | 521 (41.28) | 1.31 ± 0.32 |  |
| Living arrangement | Living alone | 104 (8.24) | 1.29 ± 0.29 | < 0.001 |
| Living with spouse only | 400 (31.70) | 1.24 ± 0.24 |  |
| Living with children | 435 (34.47) | 1.29 ± 0.30 |  |
| Mixed habitation | 235 (18.62) | 1.32 ± 0.27 |  |
| Others | 88 (6.97) | 1.37 ± 0.28 |  |
| Self-rated health status | Very good/ Good | 374 (29.64) | 1.26 ± 0.26 | < 0.001 |
| General | 711 (56.34) | 1.27 ± 0.27 |  |
| Very poor/ Poor | 177 (14.03) | 1.38 ± 0.34 |  |

CNY, China Yuan.

**Table 2**. Assessment results of the respondents’ scores in all dimensions of SCL-90-R.

| **Dimensions** | **Reference range of China (**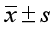**)** | **Respondents’ scores in this study (**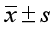**)** | ***t*** | ***P*** |
| --- | --- | --- | --- | --- |
| SOM | 1.40 ± 0.46 | 1.78 ± 0.55 | 24.67 | < 0.001 |
| OCS | 1.59 ± 0.56 | 1.19 ± 0.35 | -38.86 | < 0.001 |
| INTS | 1.38 ± 0.45 | 1.19 ± 0.27 | -23.60 | < 0.001 |
| DEPR | 1.36 ± 0.44 | 1.17 ± 0.28 | -23.31 | < 0.001 |
| ANX | 1.29 ± 0.40 | 1.19 ± 0.29 | -11.50 | < 0.001 |
| HOS | 1.35 ± 0.44 | 1.13 ± 0.28 | -26.86 | < 0.001 |
| PHOA | 1.17 ± 0.31 | 1.21 ± 0.36 | 4.21 | < 0.001 |
| PARI | 1.30 ± 0.42 | 1.17 ± 0.30 | -14.56 | < 0.001 |
| PSY | 1.24 ± 0.35 | 1.19 ± 0.29 | -5.33 | < 0.001 |
| Sleeping and eating | 1.52 ± 0.59 | 1.34 ± 0.48 | -12.81 | < 0.001 |

SOM, Somatization; OCS, Obsessive-Compulsive Disorder; INTS, Interpersonal Sensitivity; DEPR, Depression; ANX, Anxiety; HOS, Hostility; PHOA, Phobic Anxiety; PARI, Paranoid Ideation; PSY, Psychoticism.

**Table 3**. Predictors of factors associated with the total score of SCL-90-R among the Hakka elderly.

| **Variables** | **Categories** | **β** | **S. E** | ***t*** | ***P* value** | **95% CI for β** |
| --- | --- | --- | --- | --- | --- | --- |
| Sex (ref= male) | Female | 0.030 | 0.015 | 2.019 | 0.044 | (0.001, 0.060) |
| Age (ref= 60-64) | 65-69 | -0.222 | 0.022 | -9.907 | < 0.001 | (-2.267, -0.178) |
| 70-74 | -0.145 | 0.025 | -5.903 | < 0.001 | (-0.193, -0.097) |
| 75-79 | -0.243 | 0.027 | -9.040 | < 0.001 | (-0.296, -0.190) |
| ≥ 80 | -0.224 | 0.028 | -8.053 | < 0.001 | (-0.278, -0.169) |
| Marital status (ref = married/ cohabitation) | Widowed | 0.053 | 0.023 | 2.319 | 0.021 | (0.008, 0.097) |
| Others | 0.047 | 0.027 | 1.739 | 0.082 | (-0.006, 0.100) |
| Hukou (ref = agricultural) | Non-agricultural | -0.009 | 0.026 | -0.336 | 0.737 | (-0.059, 0.042) |
| Current residence (ref = village) | Town | -0.091 | 0.021 | -4.356 | < 0.001 | (-0.132, -0.050) |
| County | 0.028 | 0.029 | 0.972 | 0.331 | (-0.029, 0.086) |
| Education level (ref = illiterate) | Literacy class/ home school | -0.071 | 0.025 | -2.796 | 0.005 | (-0.120, -0.021) |
| Primary school | -0.061 | 0.028 | -2.189 | 0.029 | (-0.115, -0.006) |
| ≥ Junior high school | 0.012 | 0.030 | 0.408 | 0.683 | (-0.047, 0.072) |
| Average annual household incomes (ref = 15,000 or lower) | 15,000 ~ 30,000 | -0.028 | 0.021 | -1.329 | 0.184 | (-0.068, 0.013) |
| 30,001 ~ 45,000 | -0.087 | 0.026 | -3.342 | 0.001 | (-0.138, -0.036) |
| 45,001 ~ 60,000 | -0.103 | 0.031 | -3.294 | 0.001 | (-0.164, -0.042) |
| 60,001 or higher | -0.138 | 0.039 | -3.550 | < 0.001 | (-0.214, -0.062) |
| Survival of parents (ref= both died) | Father or/ and mother alive | 0.047 | 0.019 | 2.431 | 0.015 | (0.009, 0.085) |
| Living arrangement (ref = living alone) | Living with spouse only | -0.075 | 0.035 | -2.167 | 0.030 | (-0.142, -0.007) |
| Living with children | -0.104 | 0.033 | -3.170 | 0.002 | (-0.169, -0.040) |
| Mixed habitation | 0.100 | 0.031 | 3.225 | 0.001 | (0.039, 0.160) |
| Others | 0.123 | 0.039 | 3.175 | 0.002 | (0.047, 0.198) |
| Self-rated health status (ref = very good/ Good) | General | 0.021 | 0.018 | 1.130 | 0.259 | (-0.015, 0.056) |
| Very poor/ Poor | 0.110 | 0.026 | 4.182 | < 0.001 | (0.058, 0.162) |
